# Supplementary material
Source: MDPI journal article supplement (https://www.mdpi.com/2076-3417/12/8/3733)
Supplement: s1 [file s1]

# Quenching efficiency of quantum dots conjugated to lipid bi-layers on graphene oxide evaluated by fluorescence single particle tracking

Yoshiaki Okamoto <sup>1</sup>, Seiji Iwasa <sup>1</sup> and Ryugo Tero <sup>1, \*</sup>

<sup>1</sup> Department of Applied Chemistry and Life Science, Toyohashi University of Technology, Toyohashi, 441-8580, Japan; y093506@gmail.com (Y.O.); iwasa@chem.tut.ac.jp (S.I.)

\* Correspondence: tero@tut.jp

## Single particle tracking movie

The original movie of the QD diffusion trajectory shown in Figure 3b is uploaded as **Video S1**. View size was 36.06×36.06  $\mu\text{m}^2$  and frame rate was 33 frames per second.

## Time course of the fluorescence intensity of quantum dots

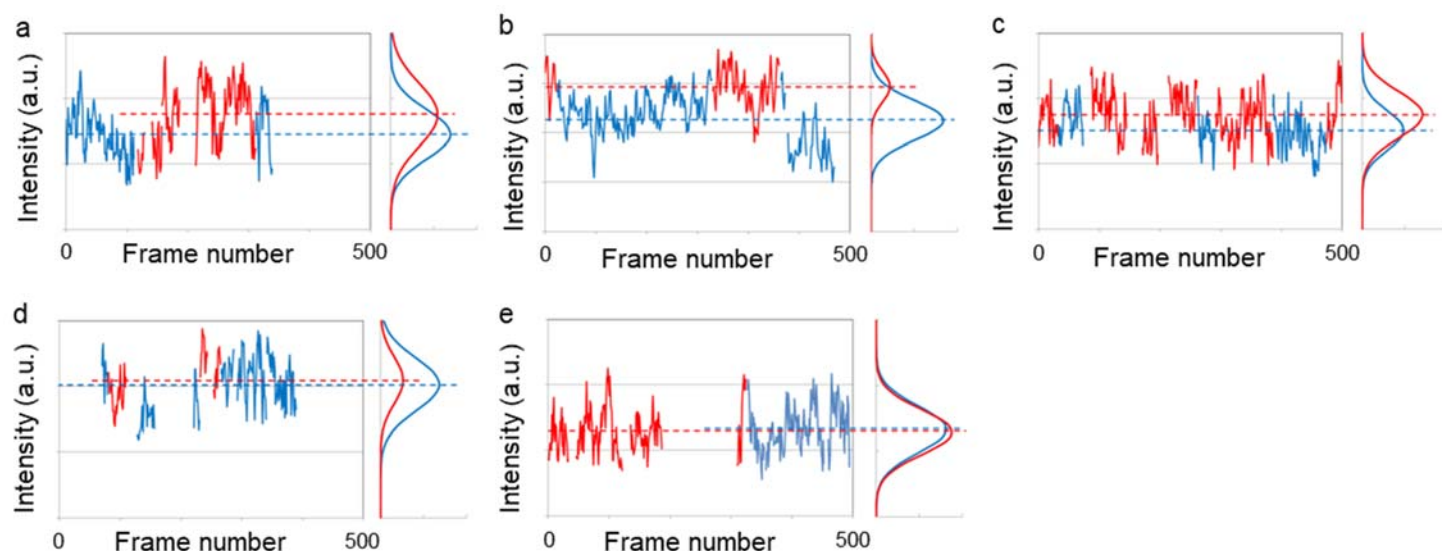

**Figure S1.** Time traces of the fluorescence intensity of the QDs during the diffusion. The intensities obtained in the GO region and the SiO<sub>2</sub> region without GO are depicted in blue and red, respectively. The histogram of the fluorescence intensity in each region is illustrate on the right. The average intensity of each region is indicated with the dotted line. (a)-(e) correspond to #2-#5 in Table 1.
